# Supplementary material for: Centor criteria in children in a paediatric emergency department: for what it is worth
Source: PubMed Central journal article supplement — BMJ Open. 2013 Apr 22;3(4):e002712. doi: 10.1136/bmjopen-2013-002712 (PMC3641432; doi:10.1136/bmjopen-2013-002712), 2013-04-22
Supplement: bmjopen-2013-002712.reviewer_comments.pdf [file bmjopen-2013-002712.reviewer_comments.pdf]

## PEER REVIEW HISTORY

BMJ Open publishes all reviews undertaken for accepted manuscripts. Reviewers are asked to complete a checklist review form ([see an example](#)) and are provided with free text boxes to elaborate on their assessment. These free text comments are reproduced below. Some articles will have been accepted based in part or entirely on reviews undertaken for other BMJ Group journals. These will be reproduced where possible.

### ARTICLE DETAILS

|                            |                                                                                               |
|----------------------------|-----------------------------------------------------------------------------------------------|
| <b>TITLE (PROVISIONAL)</b> | Centor criteria in children in a pediatric emergency department: A retrospective cohort study |
| <b>AUTHORS</b>             | Roggen, Inge; van Berlaer, Gerlant; Gordts, Frans; Pierard, Denis; Hubloue, Ives              |

### VERSION 1 - REVIEW

|                        |                                                                                                                                                                                     |
|------------------------|-------------------------------------------------------------------------------------------------------------------------------------------------------------------------------------|
| <b>REVIEWER</b>        | Philippe Lepage, MD, PhD<br>Head, Department of Paediatrics<br>Hôpital Universitaire des Enfants Reine Fabiola<br>Université Libre de Bruxelles<br>15, av JJ Crocq<br>1020 Brussels |
| <b>REVIEW RETURNED</b> | 14-Feb-2013                                                                                                                                                                         |

|                         |                                                                                                                                                                                                                                                                                                                                                                                                                                                                                                                                                                                                                                                                                                                                                                                                                                                                                                               |
|-------------------------|---------------------------------------------------------------------------------------------------------------------------------------------------------------------------------------------------------------------------------------------------------------------------------------------------------------------------------------------------------------------------------------------------------------------------------------------------------------------------------------------------------------------------------------------------------------------------------------------------------------------------------------------------------------------------------------------------------------------------------------------------------------------------------------------------------------------------------------------------------------------------------------------------------------|
| <b>THE STUDY</b>        | <p>1) As far as I am concerned, the major limitation of this study is not so much that not all children received a throat swab, but rather the retrospective nature of the study which introduces a selection bias.</p> <p>2) Only 441 episodes were selected out of a total of 2118 visits. It is therefore difficult to evaluate how representative these children were of the whole population of children with sore throats.</p> <p>3) Clinical scores are not useful to diagnose GAS sore throats. They may however be very helpful to exclude GAS infections and diagnose viral pharyngitis (see Smeesters P et al Pediatrics 2006 validated by Joachim L et al, Pediatrics 2010). This should also be mentioned.</p>                                                                                                                                                                                   |
| <b>GENERAL COMMENTS</b> | <p>This is an interesting, clear and well-written manuscript on an important issue in Paediatrics/General Medicine.</p> <p>Major remarks :</p> <p>1) As far as I am concerned, the major limitation of this study is not so much that not all children received a throat swab, but rather the retrospective nature of the study which introduces a selection bias.</p> <p>2) Only 441 episodes were selected out of a total of 2118 visits. It is therefore difficult to evaluate how representative these children were of the whole population of children with sore throats.</p> <p>3) Table 1 : 45% of children 2 to 4 years old were GAS +. These young children might be healthy GAS carrier with viral pharyngitis. This should be discussed.</p> <p>4) Table 1 : It is surprising to note that, in preschoolers, the prevalence of GAS decreased with increasing Centor criteria. Some comments ?</p> |

|  |                                                                                                                                                                                                                                                                                 |
|--|---------------------------------------------------------------------------------------------------------------------------------------------------------------------------------------------------------------------------------------------------------------------------------|
|  | 5) Clinical scores are not useful to diagnose GAS sore throats. They may however be very helpful to exclude GAS infections and diagnose viral pharyngitis (see Smeesters P et al Pediatrics 2006 validated by Joachim L et al, Pediatrics 2010). This should also be mentioned. |
|--|---------------------------------------------------------------------------------------------------------------------------------------------------------------------------------------------------------------------------------------------------------------------------------|

|                        |                                                                                                                                |
|------------------------|--------------------------------------------------------------------------------------------------------------------------------|
| <b>REVIEWER</b>        | Maurizio de Martino, MD<br>Professor of Paediatrics<br>University of Florence, Anna Meyer Children's Hospital, Florence, Italy |
| <b>REVIEW RETURNED</b> | 11-Mar-2013                                                                                                                    |

- The reviewer completed the checklist but made no further comments.

### VERSION 1 – AUTHOR RESPONSE

Reviewer: Philippe Lepage, MD, PhD  
Head, Department of Paediatrics  
Hôpital Universitaire des Enfants Reine Fabiola  
Université Libre de Bruxelles  
No conflict of interest

This is an interesting, clear and well-written manuscript on an important issue in Paediatrics/General Medicine.

Major remarks :

1) As far as I am concerned, the major limitation of this study is not so much that not all children received a throat swab, but rather the retrospective nature of the study which introduces a selection bias.

Answer: This has been added to limitations

2) Only 441 episodes were selected out of a total of 2118 visits. It is therefore difficult to evaluate how representative these children were of the whole population of children with sore throats.

Answer: acknowledged, the 441 children included had indeed more often tonsillar exudate, fever and swollen cervical lymph nodes (and thus a higher Centor score). However, gender and median age are the same in the included and the excluded children, in both subgroups. This has been added to the manuscript.

|                           | Excluded (n=1677) | Included (n=441) | p-value |
|---------------------------|-------------------|------------------|---------|
| % boys (preschoolers)     | 46.7%             | 44.4%            | 0.6     |
| % boys (kids)             | 49.3%             | 54.2%            | 0.4     |
| Median age (preschoolers) | 3.26 years        | 3.31 years       | 0.7     |
| Median age (kids)         | 7.60 years        | 7.60 years       | 0.2     |
| Tonsillar exudate         | 32.7%             | 53.3%            | <0.0001 |
| Swollen lymph nodes       | 43.4%             | 53.1%            | <0.05   |
| Fever                     | 74.4%             | 81.6%            | 0.002   |
| Absence of cough          | 68.2%             | 70.8%            | 0.7     |
| Centor score              | 2.2               | 2.6              | <0.0001 |

3) Table 1 : 45% of children 2 to 4 years old were GAS +. These young children might be healthy GAS carrier with viral pharyngitis. This should be discussed.

Answer: 45% of children 2 to 4 years old with a Centor score <2 (table 1) were indeed GAS+. The possibility of healthy carriage has been added to the discussion.

4) Table 1: It is surprising to note that, in preschoolers, the prevalence of GAS decreased with increasing Centor criteria. Some comments ?

Answer: This has been added to the discussion.

5) Clinical scores are not useful to diagnose GAS sore throats. They may however be very helpful to exclude GAS infections and diagnose viral pharyngitis (see Smeesters P et al Pediatrics 2006 validated by Joachim L et al, Pediatrics 2010). This should also be mentioned.

Answer: This part of the discussion is rewritten.

The scoring system from Smeesters et al. has indeed a higher sensitivity to exclude GAS in children compared to the Centor scoring system. Our results show that a child with a Centor score below 3 still has a 30% probability of having GAS+ throat swab culture. As 30% is the overall GAS prevalence in this age group, the Centor score is (at least in our group) insensitive to assess the absence of GAS. We bear in mind that the major limitation of a throat swab culture is that it does not distinguish between GAS pharyngitis and asymptomatic GAS carriage.

Minor remark :

Page 5, line 44 : « ... thus its use should ... » and not «... it's use...»

Answer: corrected

Reviewer: Maurizio de Martino, MD

Professor of Paediatrics

University of Florence, Anna Meyer Children's Hospital, Florence, Italy

(There are no comments.)
